# 1 Extensive transfer of membrane lipid biosynthetic genes between Archaea and 2 Bacteria

3  
4 Gareth A. Coleman<sup>1</sup>, Richard D. Pancost<sup>2</sup>, Tom A. Williams<sup>1\*</sup>

5  
6 1. School of Biological Sciences, University of Bristol, BS8 1TH, Bristol, UK

7 2. School of Earth Sciences, University of Bristol, BS8 1TH, Bristol, UK

8  
9 \*corresponding author: [tom.a.williams@bristol.ac.uk](mailto:tom.a.williams@bristol.ac.uk)

## 10 11 Abstract

12  
13 The divergence between Bacteria and Archaea may represent the deepest split in the  
14 tree of life. One of the key differences between the two domains are their membrane  
15 lipids, which are synthesised by distinct biosynthetic pathways with non-homologous  
16 enzymes. This 'lipid divide' has important implications for the early evolution of cells,  
17 and motivates the hypothesis that the last universal common ancestor (LUCA) may  
18 have lacked a modern cell membrane. However, we still know surprisingly little about  
19 the natural diversity of prokaryotic lipids in modern environments, or the evolutionary  
20 origins of the genes that produce them. In particular, the discovery of environmental  
21 lipids, such as glycerol dialkyl glycerol tetraethers with a mixture of classically archaeal  
22 and bacterial features, suggest that the 'lipid divide' may be less clear cut than  
23 previously assumed. Here, we investigated the distribution and evolutionary history  
24 of membrane lipid biosynthesis genes across the two domains. Our analyses reveal  
25 extensive inter-domain horizontal transfer of core lipid biosynthetic genes, and suggest  
26 that many modern Bacteria and Archaea have the capability to biosynthesize  
27 membrane lipids of the opposite "type". Gene tree rooting further suggests that the  
28 canonical archaeal pathway could be older than the bacterial pathway, and could have  
29 been present in LUCA.

## 30 31 32 Introduction

33  
34 Archaea and Bacteria form the two primary domains of life (see review Williams et al.  
35 2013). While overwhelming similarities in their fundamental genetics and biochemistry  
36 and evidence of homology in a near-universally conserved core of genes (Weiss et al.  
37 2016) strongly suggest that Archaea and Bacteria descend from a universal common  
38 ancestor (LUCA), they also differ in ways that have important implications for the early  
39 evolution of cellular life. These differences include DNA replication (Kelman and  
40 Kelman 2014), transcription (Bell and Jackson 1998), DNA packaging (Reeve et al.  
41 1997), and cell wall compositions (Kandler 1995). One striking difference is in the lipid  
42 composition of the cell membranes (Fig. 1), which is particularly important for  
43 understanding the origin of cellular life. Canonically, Archaea have isoprenoid chains  
44 attached to a glycerol-1-phosphate (G1P) backbone via ether bonds, and can have  
45 either membrane spanning or bilayer-forming lipids (Lombard et al. 2012). Most  
46 bacteria, as well as eukaryotes, classically have acyl (fatty acid) chains attached to a  
47 glycerol-3-phosphate (G3P) backbone via ester bonds and form bilayers (Lombard et  
48 al. 2012), although a number of exceptions have been documented (Sinninghe  
49 Damsté et al. 2002a; Weijers et al. 2006; Sinninghe Damsté et al. 2007; Goldfine  
50 2010). These lipids are synthesised by non-homologous enzymes via different

51 biosynthetic pathways (Fig. 1). This so-called ‘lipid divide’ (Koga 2011) raises some  
 52 important questions regarding the early evolution of cellular life, including the number  
 53 of times cell membranes evolved, whether LUCA had a cell membrane, and if so, what  
 54 the nature of that membrane was.  
 55

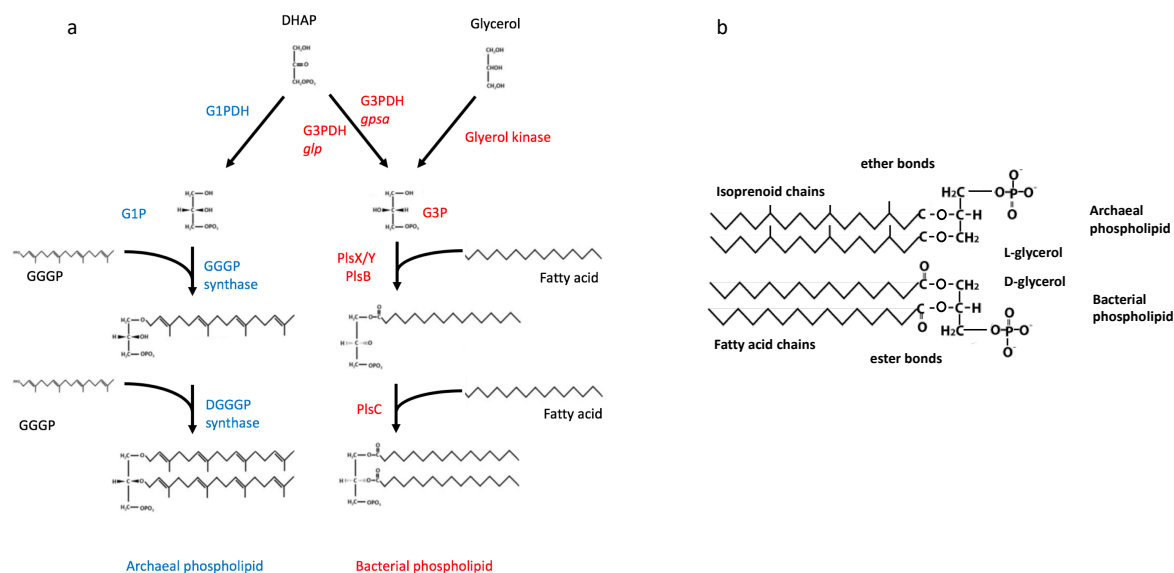

56 **Figure 1. a)** The canonical phospholipid biosynthetic pathways in Archaea and Bacteria. Archaeal  
 57 enzymes in blue, bacterial enzymes in red. **b)** Composition of bacterial and archaeal phospholipids.  
 58 In Archaea, G1P is synthesised from dihydroxyacetone phosphate (DHAP) using the enzymes  
 59 glycerol-1-phosphate dehydrogenase (G1PDH). The first and second isoprenoid chains (GGGPs)  
 60 are added by garenygarenylgcerol synthase (GGGPS) and digarenylgarenylgecerol synthase  
 61 (DGGGPS) respectively. In Bacteria, G3P is synthesised by glycerol-3-phosphate dehydrogenase  
 62 (G3PDH) from DHAP. There are two forms of this enzyme, encoded by the *gpsA* and *glp* genes  
 63 respectively. G3P may also be produced form glycerol by glycerol kinase (*glpK*). In certain  
 64 Bacteria, such as Gammaproteoteobacteria, the first fatty-acid chain is added by a version of  
 65 glycerol-3-phosphate acyltransferase encoded by the *PlsB* gene. Other Bacteria, including most  
 66 gram positive bacteria, use a system another glycerol-3-phosphate acyltransferase encoded by  
 67 *PlsY*, in conjunction with an enzymes encoded by *PlsX* (Yoa and Rock 2013; Parsons and Rock  
 68 2013). The second fatty-acid chain is attached by 1-acylglycerol-3-phosphate O-acyltransferase,  
 69 encode by *PlsC*.  
 70

71  
 72  
 73 The observation that lipid biosynthesis in Bacteria and Archaea is non-homologous  
 74 has motivated the hypotheses that LUCA had no, or only a rudimentary, membrane,  
 75 with modern ion-tight membranes evolving in parallel along the stem lineage of each  
 76 prokaryotic domain (Koga et al. 1998; Martin and Russell 2003; Sousa et al. 2013;  
 77 Sojo et al. 2014; Sousa and Martin 2014). In these scenarios, the acellular LUCA is  
 78 envisaged as a non-free living entity that lived on a pyrite substrate (Wächtershäuser  
 79 1988; Wächtershäuser 1992) or inhabited mineral compartments within alkaline  
 80 hydrothermal vents (Martin and Russell 2003; Sousa et al. 2013); the latter hypothesis  
 81 gains additional explanatory strength from similarities between the geochemistry at  
 82 modern vents and the biochemistry of one of the most ancient pathways for biological  
 83 carbon fixation, the Wood Ljungdahl pathway (Sousa et al. 2013; Weiss et al. 2016;  
 84 Williams et al. 2017; Adam et al. 2018). An alternative view is that LUCA may have  
 85 had a fully modern, ion-tight membrane, which was heterochiral with respect to

86 membrane stereochemistry (Wächtershäuser 2003), with later independent transitions  
87 to homochirality in Bacteria and Archaea driven by increased membrane stability.  
88 However, the available experimental evidence - including the recent engineering of an  
89 *Escherichia coli* cell with a heterochiral membrane (Caforio et al. 2018) - suggests that  
90 homochiral membranes are not necessarily more stable than heterochiral ones (Fan  
91 et al. 1995; Shimada and Yamagishi 2011; Caforio et al. 2018), requiring some other  
92 explanation for the loss of ancestral heterochirality.

93  
94 The lipid divide has also played an important role in debates about the origin of  
95 eukaryotic cells, whose membrane lipids are predominantly (though not exclusively  
96 (Goldfine 2010; Tan et al. 2012)) of the bacterial type. Thus, scenarios for eukaryote  
97 origins that invoke a symbiosis between an archaeal host cell and a bacterial  
98 endosymbiont – the class of scenarios that has received the greatest phylogenetic and  
99 comparative genomic support (Martin and Muller 1998; Embley and Martin 2006; Cox  
100 et al. 2008; Guy and Ettema 2011; Williams et al. 2013; Martin et al. 2015; Williams  
101 and Embley 2015; Spang et al. 2015; Eme et al. 2017; Zaremba-Niedzwiedzka et al.  
102 2017) – require a corollary to explain the change in host membrane composition.  
103 Several possibilities have been proposed. Gould et al. (2016) posit that vesicle  
104 secretions from the mitochondria were incorporated into the cell membrane, altering  
105 its composition. Baum and Baum (2014), as part of their ‘inside-out’ model, suggest  
106 that eukaryotes could have acquired bacterial lipids from mitochondria via traffic  
107 across ER-mitochondrial contact sites. Bacteria may have adopted ‘bacterial’ lipids  
108 due to living in mesophilic environments and no longer needing membranes adapted  
109 for thermophilic conditions. Other endosymbiotic models, such as the syntrophy model  
110 (López-García and Moreira 2006), or non-endosymbiotic models have been devised  
111 to explain bacterial lipids in eukaryotes (Woese et al. 1990; Kandler 1995).

112  
113 Despite the importance of the lipid divide for our understanding of early cellular  
114 evolution, membrane lipid stereochemistry has been experimentally determined for a  
115 surprisingly limited range of Bacteria and Archaea, perhaps owing to the expense and  
116 difficulty of characterisation (Sinninghe Damsté, et al. 2002a; Weijers et al. 2006;  
117 Sinninghe Damsté et al. 2014). Interestingly, the limited data that are available suggest  
118 that the distinction between bacterial and archaeal membranes may be less clear-cut  
119 than was previously thought. For example, the model bacterium *Bacillus subtilis* has  
120 been shown to synthesise both bacterial- and archaeal-type lipids (Guldán et al. 2008;  
121 Guldán et al. 2011). Further, some characterised lipids possess a mixture of archaeal  
122 and bacterial features, including the plasmalogens of animals and anaerobic bacteria,  
123 which include an ether bond (Goldfine 2010), and the branched glycerol dialkyl  
124 glycerol tetra-ether (brGDGT) lipids of Bacteria (Sinninghe Damsté et al. 2002b).  
125 brGDGTs have bacterial stereochemistry and branched rather than isoprenoidal alkyl  
126 chains, but they also contain ether bonds and span the membrane, as observed for  
127 canonical archaeal lipids. These brGDGTs are particularly abundant in peat bogs and  
128 were thought to be produced by Bacteria as adaptations to low pH environments  
129 (Sinninghe Damsté et al. 2002b; Weijers et al. 2006; Sinninghe Damsté et al. 2007),  
130 but are now known to occur in a wide range of soils and aquatic settings (Schouten et  
131 al. 2013a). The enzymes responsible for their synthesis are currently unknown. On the  
132 other side of the “lipid divide”, some Archaea have been shown to produce membrane  
133 lipids with fatty acid chains and ester bonds (Gattinger et al. 2002). The biosynthetic  
134 pathways for all of these mixed-type membrane lipids remain unclear. However, given  
135 the frequency with which prokaryotes undergo horizontal gene transfer (García-Vallvé

136 et al. 2000), one possibility is that these mixed biochemical properties reflect  
137 biosynthetic pathways of mixed bacterial and archaeal origin. This prompted us to  
138 investigate the distribution and phylogeny of phospholipid biosynthesis enzymes  
139 across the two domains and evaluate the evidence for inter-domain horizontal gene  
140 transfer. Our analysis focused on the core enzymes that establish membrane lipid  
141 stereochemistry and attach the two carbon chains to the glycerol-phosphate backbone  
142 (Figure 1), as the histories of these enzymes are key to understanding the evolution  
143 of membrane stereochemistry and biosynthesis.

144

145

## 146 **Results and Discussion**

147

### 148 *Extensive inter-domain lateral transfer of core phospholipid biosynthesis genes*

149

150 We performed BLASTp searches for the enzymes of the canonical archaeal and  
151 bacterial lipid biosynthesis pathways (Figure 1) against all archaeal and bacterial  
152 genomes in the NCBI nr database. Our BLAST searches revealed homologues for all  
153 of the core phospholipid biosynthesis genes of both pathways in both prokaryotic  
154 domains, with the exception of bacterial enzymes PlsB and PlsX, which we did not find  
155 in Archaea. Orthologues of the canonical archaeal genes are particularly widespread  
156 in many bacterial lineages (Table 1). Of 48 bacterial phyla, 6 have at least one  
157 sequence identified as an orthologue of each of the three archaeal genes (Table 1,  
158 highlighted in yellow). Of these phyla, Firmicutes (genera *Bacillus*, *Halanaerobium*),  
159 Actinobacteria (genera *Streptomyces*) and Fibrobacteres (genera *Chitinispirillum* and  
160 *Chitinivibrio*) contain species which have all three genes in their genomes (Table 1,  
161 highlighted yellow with asterisk). Based on the presence of all three core biosynthetic  
162 genes, and given their recognised role in lipid biosynthesis in *B. subtilis* (Guldan et al.  
163 2008; Guldan et al. 2011), we predict that these members of the Firmicutes,  
164 Actinobacteria and Fibrobacteres lineages of Bacteria are capable of making archaeal-  
165 type, glycerol-1-linked phospholipids. Of the seven FBC (Fibrobacteres, Bacteroidetes  
166 and Chlorobi) phyla we surveyed, all of them have GGGPS and DGGGPS  
167 orthologues, but only Fibrobacteres have G1PDH orthologues (see Figure 1 for  
168 overview of pathway). In these species lacking G1PDH, it is unclear whether GGGPS  
169 and DGGGPS are active and if so, what they are used for; one possibility is that they  
170 catalyse the reverse reaction, catabolising archaeal lipids as an energy source. Just  
171 10 of the 48 phyla had no orthologues of archaeal genes (Table 1, indicated by †).

172

173 Orthologues of the canonical bacterial genes are less widespread in Archaea (Table  
174 1). Of the 20 phyla surveyed, none contained all homologues, although Lokiarchaeota  
175 contained Glp, GlpK, PlsC and PlsY. Of those 20, more than half (11) had no bacterial  
176 homologues. Orthologues of GpsA, Gpl and Gpk are found in all of the major archaeal  
177 groups (Euryarchaeota, TACK, Asgardarchaeota and DPANN (Williams et al. 2017)).  
178 However, they appear sporadically. Within Euryarchaeota, of the seven classes  
179 surveyed, GpsA and Gpk appear in four and Gpl in five. With the TACK superphylum,  
180 Gpl and GlpK appear in Crenarchaeota and Korarchaeota, while GpsA appears only  
181 in a single crenarchaeote (*Thermofilum*). GpsA is also found in two of the 11 DPANN  
182 phyla surveyed (Woesearchaeota and GW2011), while GlpK is found in one phylum  
183 (Woesearchaeota) and Gpl is found in none. Within the Asgardarchaeota  
184 superphylum, no orthologues for GpsA are found, and only one of the four phyla  
185 (Lokiarchaeota) has Gpl or GlpK. PlsC and PlsY are more restricted, being found





|     |  |                                 |   |   |   |   |   |   |   |
|-----|--|---------------------------------|---|---|---|---|---|---|---|
|     |  | Deferribacterales†              |   |   | ✓ | ✓ | ✓ | ✓ | ✓ |
|     |  | Deinococcus-Thermus             |   | ✓ | ✓ | ✓ | ✓ | ✓ | ✓ |
|     |  | Dictyoglomi                     | ✓ |   | ✓ |   | ✓ | ✓ | ✓ |
|     |  | Elusimicrobia                   |   | ✓ | ✓ | ✓ | ✓ | ✓ | ✓ |
|     |  | <b>Firmicutes*</b>              | ✓ | ✓ | ✓ | ✓ | ✓ | ✓ | ✓ |
|     |  | Fusobacteria                    |   | ✓ |   | ✓ | ✓ | ✓ | ✓ |
|     |  | Gemmatimonadetes                |   | ✓ | ✓ | ✓ | ✓ | ✓ | ✓ |
|     |  | Latescibacteria                 |   | ✓ | ✓ | ✓ |   | ✓ | ✓ |
|     |  | Lentisphaerae                   | ✓ |   | ✓ | ✓ | ✓ | ✓ | ✓ |
|     |  | Melainabacteria                 | ✓ | ✓ |   | ✓ | ✓ | ✓ | ✓ |
|     |  | Nitrospinae†                    |   |   | ✓ | ✓ |   | ✓ | ✓ |
|     |  | Nitrospirae                     | ✓ |   | ✓ | ✓ | ✓ | ✓ | ✓ |
|     |  | Parcubacteria                   |   | ✓ | ✓ | ✓ |   | ✓ | ✓ |
|     |  | <b>Proteobacteria</b>           | ✓ | ✓ | ✓ | ✓ | ✓ | ✓ | ✓ |
|     |  | Rhodothermaeota                 |   | ✓ | ✓ | ✓ |   | ✓ | ✓ |
|     |  | Spirochaetes                    | ✓ | ✓ |   | ✓ | ✓ | ✓ | ✓ |
|     |  | Synergistetes                   | ✓ |   |   | ✓ |   | ✓ | ✓ |
|     |  | Tenericutes†                    |   |   | ✓ | ✓ | ✓ | ✓ | ✓ |
|     |  | Thermobaculum†                  |   |   | ✓ | ✓ | ✓ | ✓ | ✓ |
|     |  | Thermodesulfobacteria†          |   |   | ✓ |   |   | ✓ | ✓ |
|     |  | Thermotogae                     | ✓ | ✓ |   | ✓ | ✓ | ✓ | ✓ |
|     |  | TMED                            |   | ✓ |   |   |   | ✓ | ✓ |
| FBC |  | Chlorobi                        |   | ✓ | ✓ | ✓ | ✓ | ✓ | ✓ |
|     |  | Bacteroidetes                   |   | ✓ | ✓ | ✓ |   | ✓ | ✓ |
|     |  | <b>Fibrobacteres*</b>           | ✓ | ✓ | ✓ | ✓ |   | ✓ | ✓ |
|     |  | Ignavibacteria                  |   | ✓ | ✓ | ✓ |   | ✓ | ✓ |
|     |  | Candidatus Kryptonium           |   | ✓ | ✓ | ✓ |   | ✓ | ✓ |
|     |  | Candidatus Kryptobacter         |   | ✓ | ✓ | ✓ |   | ✓ | ✓ |
|     |  | Candidate division Zixibacteria |   | ✓ | ✓ | ✓ |   | ✓ | ✓ |
| PVC |  | Chlamydiae†                     |   |   | ✓ |   | ✓ | ✓ | ✓ |
|     |  | Planctomycetes                  | ✓ |   |   | ✓ | ✓ | ✓ | ✓ |
|     |  | Verrucomicrobia†                |   |   |   | ✓ |   | ✓ | ✓ |

188  
189  
190  
191  
192  
193  
194  
195  
196  
197  
198  
199  
200  
201  
202

**Table 1. Table detailing the distribution of lipid biosynthesis genes in bacteria and archaeal phyla.** Ticks represent phyla (class level for Euryarchaeota) with at least one genome which has a sequence for the corresponding gene. Bacterial phyla where all three archaeal genes are found are highlighted in yellow. Those bacterial phyla where all three archaeal genes are found within the same genome in at least one case, are marked with an asterisk (\*). Those bacterial phyla with no archaeal genes are found are marked with †. It should be noted that in the case of environmental lineages, the lack of a tick may not represent absence of genes, given that these represent metagenomics bins, and the lack of said genes may be due to missing data. FBC are Fibrobacteres, Bacteroidetes and Chlorobi. PVC are Planctomycetes, Verrucomicrobia and Chlamydiae. TACK are Thaumarchaeota, Aigarchaeota, Crenarchaeota and Korarchaeota. DPANN include Diaphoretites, Parvarchaeota, Aenigmarchaeota, Nanoarchaeota and Nanohaloarchaeota, as well as several other lineages.

203 mainly in environmental lineages within Euryarchaeota (Marine Groups II/III, all in  
204 class Thermoplasmatales), DPANN and Asgardarchaeota (Table 1).

205

206

### 207 *Early origins of archaeal-type membrane lipid biosynthesis genes in Bacteria*

208

209 To investigate the evolutionary histories of these genes, we inferred Bayesian single-  
210 gene phylogenies from the amino acid sequences using PhyloBayes 4.1 (Lartillot and  
211 Philippe 2004; Lartillot et al. 2007). We selected the best-fitting substitution model for  
212 each gene according to its Bayesian Information Criterion (BIC) score using the model  
213 selection tool in IQ-Tree (Nguyen et al. 2015). We used two complementary  
214 approaches to root these single-gene trees: a lognormal uncorrelated molecular clock  
215 in BEAST (Drummond and Rambaut 2007; Drummond et al. 2012), and the recently-  
216 described minimal ancestor deviation (MAD) rooting method of Tria et al. (2017). The  
217 MAD algorithm finds the root position that minimises pairwise evolutionary rate  
218 variation, averaged over all pairs of taxa in the tree. Many of our single gene trees  
219 were poorly resolved; since the existing implementation of the MAD algorithm (Tria et  
220 al. (2017)) does not explicitly incorporate topological uncertainty, we used MAD to root  
221 all of the trees sampled during the MCMC run, summarising posterior root support in  
222 the same way as for the molecular clock analyses; in the discussion below, we use  
223 the maximum *a posteriori* root as a point estimate for comparison between the two  
224 methods. For the genes for which a suitable outgroup was available (G1PDH, GpsA  
225 and Glp, following Yokobori et al. 2016), we compared our results to traditional  
226 outgroup rooting. For more details, see Materials and Methods.

227

228 Glycerol-1-phosphate dehydrogenase (G1PDH) is the enzyme that establishes  
229 phospholipid stereochemistry in Archaea. The archaeal G1PDH sequences form a  
230 well-supported clan (Wilkinson et al. 2007)(PP = 0.99) in the tree (Figure 2a), although  
231 the relationships within the group are poorly resolved. Interestingly, the majority of the  
232 bacterial G1PDH orthologues do not appear to be recent horizontal acquisitions from  
233 Archaea, but instead form a deep-branching clan resolved as sister to the archaeal  
234 lineage. The root position that receives the highest posterior support in the relaxed  
235 molecular clock analysis is that between the archaeal and bacterial clans, with a  
236 marginal posterior probability of 0.68 (Supplementary Table 1). This is substantially  
237 higher than the next most probable position, which places the root within the Bacteria  
238 with a posterior of 0.1. When rooted using MAD, the same root position is recovered  
239 with a marginal posterior probability of 0.62, also substantially higher than the next  
240 most probable root of 0.1. Rooting single genes trees can prove difficult, and this  
241 uncertainty is captured in the low root probabilities inferred using both the molecular  
242 clock and MAD methods. However, these analyses can be used to exclude the root  
243 from some regions of the trees with a degree of certainty. In the case of G1PDH, a  
244 post-LUCA origin of the gene would predict a root on the archaeal stem or within the  
245 archaea. In our analyses, no such root position has a significant probability (i.e.  
246 PP>0.05), and therefore the root is highly unlikely to be within the archaea. The  
247 bacterial clan mainly comprises sequences from Firmicutes and Actinobacteria, with  
248 most of the other Bacteria grouping together in a single, maximally supported (PP =  
249 1) lineage suggestive of recent horizontal acquisition from the  
250 Firmicutes/Actinobacteria clade, followed by further HGT.

251

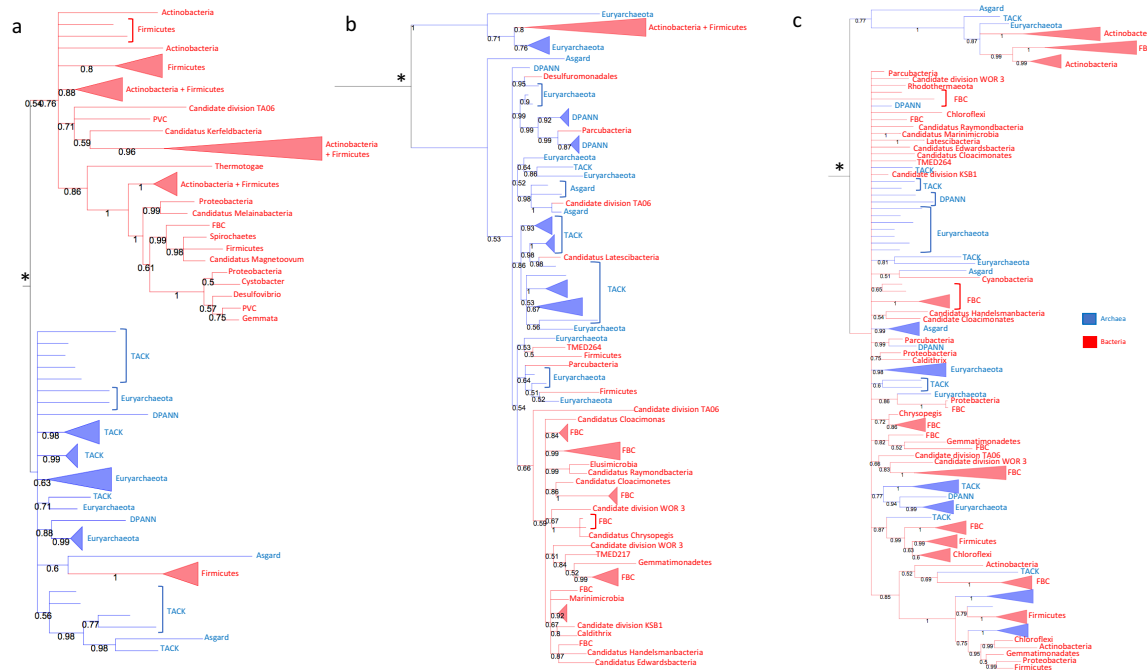

252  
253

**Figure 2. Bayesian consensus trees of archaeal enzymes, rooted using the uncorrelated lognormal molecular clock.** Support values are Bayesian posterior probabilities, and the asterisk denotes the modal root position obtained using the MAD approach. Archaea in blue and Bacteria in red **a)** G1PDH tree (111 sequences, 190 positions) inferred under the best-fitting LG+C60 model. **b)** GGGPS tree (133 sequences, 129 positions) inferred under the best-fitting LG+C40 model. **c)** DGGGPS tree (177 sequences, 97 positions) inferred under the best-fitting LG+C50 model. FBC are Fibrobacteres, Bacteroidetes and Chlorobi. PVC are Planctomycetes, Verrucomicrobia and Chlamydiae. TACK are Thaumarchaeota, Aigarchaeota, Crenarchaeota and Korarchaeota. DPANN include Diaphoretites, Parvarchaeota, Aenigmarchaeota, Nanoarchaeota and Nanohaloarchaeota, as well as several other lineages. For full trees, see Supplementary Figures 1-4. For full unrooted trees see Supplementary Figures 16-18.

265

266

This root position is consistent with two scenarios that we cannot distinguish based on the available data. One possibility is an early transfer of G1PDH from stem Archaea into Bacteria, either into the bacterial stem lineage with subsequent loss in later lineages, or into the ancestor of Actinobacteria and Firmicutes, with subsequent transfers to other Bacteria. Alternatively, G1PDH could have already been present in LUCA, and was subsequently inherited vertically in both Archaea and Bacteria, followed by loss in later bacterial lineages. The Firmicute sequences within the archaeal clade are a later transfer into those Firmicutes, apparently from a thornarchaeote archaeon or related lineage.

276

Geranylgeranylglycerol phosphate synthase (GGGPS) attaches the first isoprenoid chain to G1P. Phylogenetic analysis of GGGPS (Fig 2b) revealed two deeply divergent paralogues, with the tree confidently rooted between them using both the relaxed molecular clock (PP = 0.99) and MAD methods (PP = 1) (Supplementary Table 1); resolution within each of the paralogues was poor. One of these paralogues comprises sequences from some Euryarchaeota (including members of the Haloarchaea, Methanomicrobia and Archaeoglobi), along with Firmicutes and Actinobacteria. The other paralogue comprises sequences from the rest of the Archaea – including other Euryarchaeota - and a monophyletic bacterial clade largely consisting of members of

285



286 the FBC lineage. Taken with the root position between the two paralogues, the tree  
287 topology implies an ancestral duplication followed by sorting out of the paralogues and  
288 multiple transfers into Bacteria. To improve resolution among the deeper branches of  
289 the tree, we inferred an additional phylogeny focusing just on the larger of the two  
290 paralogues (Supplementary Figure 3). The root within this paralogous sub-tree fell  
291 between reciprocally monophyletic archaeal and bacterial clades (PP = 0.8, much  
292 higher than the next most likely root, within the bacteria, with PP = 0.07), suggesting  
293 that the gene duplication at the base of the GGGPS tree pre-dates LUCA. The  
294 recovery of two distinct paralogues has been noted in several previous studies  
295 (Nemoto et al. 2003; Boucher et al. 2004; Peterhoff et al. 2014). Since genes from  
296 both GGGPS paralogues have been experimentally characterised as  
297 geranylgeranyl glyceryl phosphate synthases (Nemoto et al. 2003; Boucher et al. 2004),  
298 it appears that this activity was already present in LUCA before the radiation of the  
299 bacterial and archaeal domains.

300  
301 Digeranylgeranyl glyceryl phosphate synthase (DGGGPS) attaches the second  
302 isoprenoid chain to G1P. DGGGPS is present in all sampled Archaea, with the  
303 exception of three of the DPANN genomes. Although the DGGGPS tree is poorly  
304 resolved (Fig. 2c), both the molecular clock and MAD root the tree between two clades,  
305 with a diversity of Archaea and Bacteria on either side (PP = 0.41 and 0.79  
306 respectively) (Supplementary Table 1). The wide distribution of this enzyme across  
307 both Archaea and Bacteria, and the occurrence of a diversity of both domains on either  
308 side of the root, for both rooting methods, suggest either multiple transfers into  
309 Bacteria from Archaea, or that DGGGPS was present in LUCA and inherited in various  
310 archaeal and bacterial lineages, followed by many later losses in and transfers  
311 between various lineages.

312  
313 In sum, our phylogenetic analyses of archaeal lipid biosynthesis genes suggest that  
314 GGGPS and DGGGPS were already present in LUCA, with G1PDH either present in  
315 LUCA or evolving along the archaeal stem. They also provide evidence for repeated,  
316 independent inter-domain transfer of these genes from archaea to bacteria throughout  
317 the evolutionary history of life.

318  
319 *Transfers of bacterial membrane lipid genes into Archaea*

320  
321 In contrast to our analyses of proteins of the classical archaeal pathway, phylogenies  
322 of proteins of bacterial-type lipid biosynthesis pathways suggested that their  
323 orthologues in Archaea were the result of relatively recent horizontal acquisitions. The  
324 root positions for each of the trees using both molecular clock and MAD have low  
325 posterior probabilities (Supplementary Table 1), so that the exact root positions are  
326 unclear; yet, support for root positions outside of the Bacteria was never obtained. This  
327 is consistent with the hypothesis that the core bacterial pathway first evolved after the  
328 bacterial lineage diverged from LUCA.

329  
330 GpsA and glp are two genes that code for glycerol-3-phosphate (G3PDH), which  
331 establishes phospholipid stereochemistry in Bacteria. The deep relationships between  
332 the archaeal and bacteria sequences in the GpsA tree are poorly resolved (Fig. 3a),  
333 while being better resolved for Glp (Fig. 3b). The root position in both trees is poorly  
334 resolved for both rooting methods (Supplementary Table 1). The highest marginal  
335 posterior probability for the root positions recovered in the GpsA tree are 0.31 and

336 0.59 and for the molecular clock and MAD respectively, and 0.5 and 0.44 respectively  
 337 for Glp. The tree inferred for GlpK (the gene that codes for glycerol synthase, which  
 338 can synthesise G3P from glycerol) (Fig. 4a) shows a similar pattern like the  
 339 phylogenies of GpsA and Glp. Again, the root positions have low posterior support  
 340 (0.47 and 0.34 for the molecular clock and MAD respectively). However, in each case,  
 341 there is evidence of multiple recent transfers from Bacteria to Archaea, as we recover  
 342 several distinct bacterial and archaeal clades with moderate to high support (0.8-1).  
 343 The main archaeal recipients of these genes are Euryarchaeota which is consistent  
 344 with reports of bacterial-like fatty acid esters in this group (Gattinger et al. 2002), and  
 345 which may suggest the occurrence of an earlier transfer into the stem lineage of this  
 346 clade. The tree topology also supports a number of more recent transfer events into  
 347 various archaeal lineages.  
 348

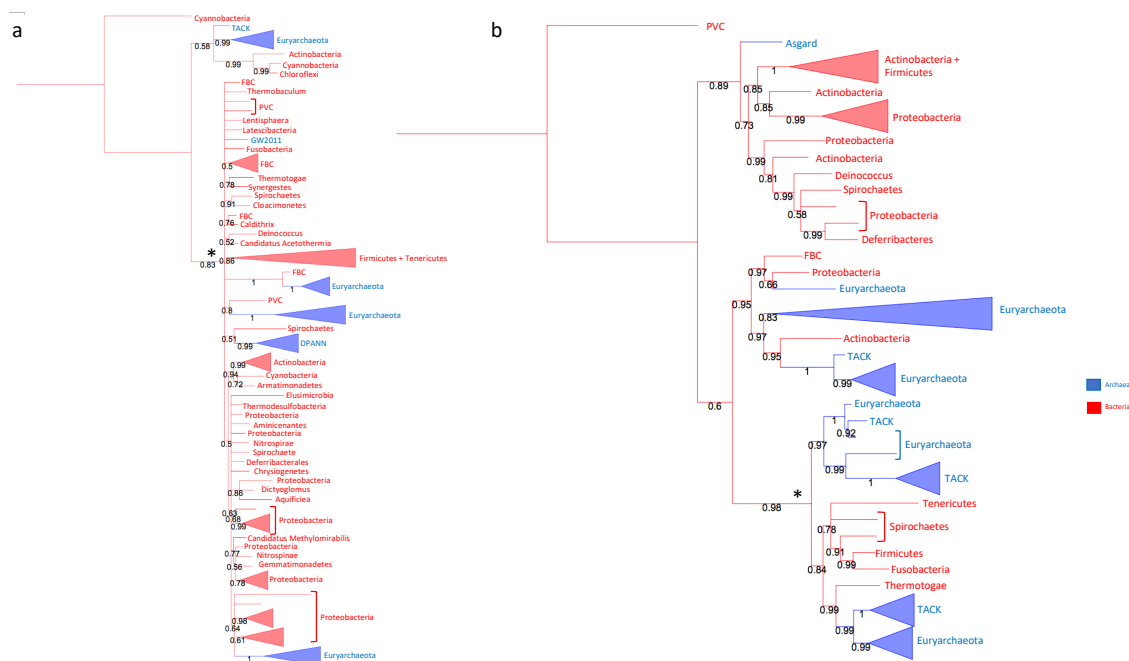

349  
 350  
 351 **Figure 3. Bayesian consensus trees of both G3PDH enzymes, rooted using the uncorrelated**  
 352 **lognormal molecular clock.** Support values are Bayesian posterior probabilities, and the asterisk  
 353 denotes the modal root position obtained using the MAD approach. Archaea in blue and Bacteria  
 354 in red. **a)** *gpsA* tree (84 sequences, 169 positions) inferred under the best-fitting LG+C60 model  
 355 **b)** *glp* tree (51 sequences, 199 positions) inferred under the best-fitting LG+C40 model. FBC are  
 356 Fibrobacteres, Bacteroidetes and Chlorobi. PVC are Planctomycetes, Verrucomicrobia and  
 357 Chlamydiae. TACK are Thaumarchaeota, Aigarchaeota, Crenarchaeota and Korarchaeota.  
 358 DPANN include Diaphoretites, Parvarchaeota, Aenigmarchaeota, Nanoarchaeota and  
 359 Nanohaloarchaeota, as well as several other lineages. For full trees, see Supplementary Figures  
 360 5-6. For full unrooted trees see Supplementary Figures 19-20.  
 361  
 362  
 363

364 PlsC and PlsY (which attach fatty acids to G3P) both have many fewer orthologues  
 365 among archaeal genomes, all of which are derived from environmental samples (Embley and  
 366 Martin 2006; Martin et al. 2015; Eme et al. 2017). Both trees are poorly resolved  
 367 (Fig 4b). Both are rooted within the Bacteria, with PlsC having the low posterior of 0.28  
 368 (with the next most likely, also within the Bacteria, being 0.1). The PlsY (Fig 4c) has a  
 369 more certain root position, with a posterior of 0.57, and the next most probable being

370 0.1. For PlsY, MAD recovers the same root as the molecular clock, with a high  
 371 posterior probability (0.85). When the PlsC tree is rooted using MAD, the root is  
 372 resolved between two clades, which are not recovered in the inferred tree topology  
 373 and has a low posterior probability of 0.03. All of the archaeal homologues seem to be  
 374 derived from transfers from Bacteria to Archaea.  
 375

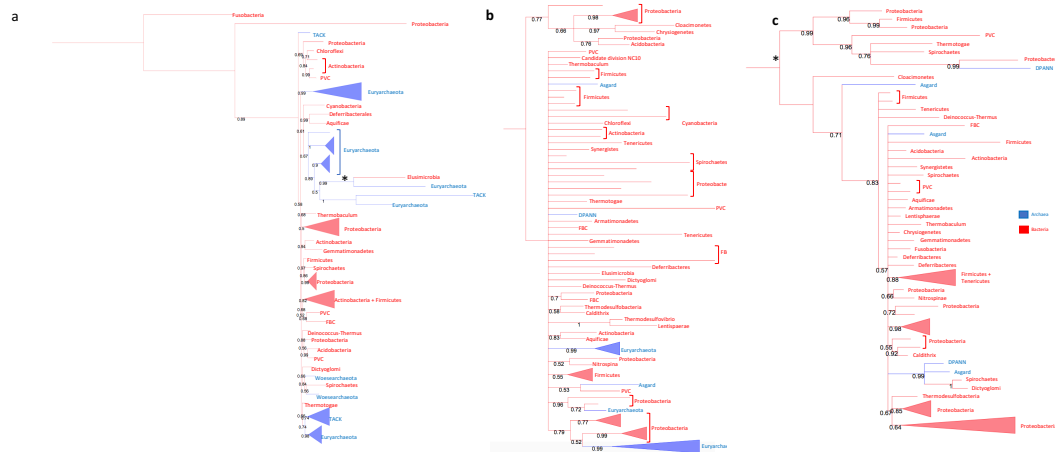

376  
 377  
 378 **Figure 4. Bayesian consensus trees of *glpK*, *PlsC* and *PlsY* enzymes, rooted using the**  
 379 **uncorrelated lognormal molecular clock.** Support values are Bayesian posterior probabilities,  
 380 and the asterisk denotes the modal root position obtained using the MAD approach. Archaea in  
 381 blue and Bacteria in red. **a)** *glpK* tree (77 sequences, 363 positions) inferred under the best-fitting  
 382 LG+C60 model **b)** *PlsC* tree (74 sequences, 57 positions) inferred under the best-fitting LG+C50  
 383 model **c)** *PlsY* tree (60 sequences, 104 positions) inferred under the best-fitting LG+C50 model.  
 384 FBC are Fibrobacteres, Bacteroidetes and Chlorobi. PVC are Planctomycetes, Verrucomicrobia  
 385 and Chlamydiae. TACK are Thaumarchaeota, Aigarchaeota, Crenarchaeota and Korarchaeota.  
 386 DPANN include Diaphoretrites, Parvarchaeota, Aenigmarchaeota, Nanoarchaeota and  
 387 Nanohaloarchaeota, as well as several other lineages. For full trees, see Supplementary Figures  
 388 7-9. For full unrooted trees see Supplementary Figures 20-23.

### 391 *Comparisons with outgroup rooting*

392  
 393 The most widely-used approach for rooting trees is to place the root on the branch  
 394 leading to a pre-defined outgroup (Penny 1976), but this can be challenging for ancient  
 395 genes for which closely-related outgroups are lacking (Gouy et al. 2015). However,  
 396 several lipid biosynthesis genes are members of larger protein families whose other  
 397 members, although distantly related, have conserved structures and related functions  
 398 (Peretó et al. 2004). Recently, Yokobori et al. (2016) used other members of these  
 399 families as outgroups to root trees for G1PDH, G3PDH (both GpsA and Glp) and GlpK.  
 400 Their root inferences differed from ours in that they found that bacterial G1PDH  
 401 sequences formed a monophyletic group that branched from within Archaea,  
 402 suggesting more recent horizontal transfer from Archaea to Bacteria, as opposed to  
 403 transfer from stem Archaea or vertical inheritance from LUCA. On the other hand, their  
 404 analysis of Glp recovered Bacteria on one side of the root, and a clade of Bacteria and  
 405 Archaea on the other. They interpreted this as evidence for the presence of Glp in  
 406 LUCA, and therefore that LUCA would have had G3P phospholipids.

407  
 408 A potential concern when using distantly-related sequences to root a tree is that the  
 409 long branch leading to the outgroup can induce errors in the in-group topologies due

410 to long branch attraction (LBA) artefacts. Further, single-matrix phylogenetic models,  
411 such as those used by Yokobori et al. (2016), have been shown to be more susceptible  
412 to artefacts of this type than the profile mixture models used here (Lartillot et al. 2007).  
413 To investigate whether the differences in root inference between our analyses and  
414 those of Yokobori et al. (2016) might be the result of LBA, we performed outgroup  
415 rooting analysis on G1PDH, GpsA and Glp, augmenting our datasets with a  
416 subsample of the outgroups used by Yokobori et al. and using the same models used  
417 to infer the unrooted trees (LG+C60 in each case). The resulting trees (Supplementary  
418 Figures 10-12) show different topologies when compared to the unrooted trees  
419 (Supplementary Figures 16, 19-20). This suggests that the long branch outgroup may  
420 be distorting the ingroup topology.

421  
422 We also performed model testing in IQ-Tree and compared the fit of the chosen  
423 models to the models used by Yokobori et al. (see Material and Methods below).  
424 LG+C60 was selected for both G1PDH and Glp, while LG+C50 was selected for Gpsa  
425 (Supplementary figure 24). The results of these analyses indicate that the empirical  
426 profile mixture models which we have used here fits each of these alignments  
427 significantly better than the single-matrix models of Yokobori et al. (Supplementary  
428 Table 2). However, even analyses under the best-fitting available models show  
429 distortion of the ingroup topology upon addition of the outgroup (Supplementary  
430 Figures 10-12, 24), when compared to the unrooted topologies (Supplementary  
431 Figures 16, 19-20). In each case, we found the root in a different place to those  
432 recovered by Yokobori et al. In the G1PDH tree, we find Bacteria, specifically  
433 Firmicutes to be most basal, rather the Crenarchaeota found by Yokobori. In the case  
434 of GpsA, Yokobori et al. did not find compelling support for an origin in LUCA, but they  
435 did recover one archaeal lineage (the Euryarchaeota) at the base of the in-group tree  
436 with low (bootstrap 48) support. While our GpsA tree is also poorly resolved, we do  
437 not find evidence to support the basal position of the archaeal lineages, and therefore  
438 for the presence of GpsA in LUCA. For glp, which Yokobori et al. trace back to LUCA  
439 due to the basal position of the archaeal sequences, the outgroup sequences did not  
440 form a monophyletic group, and were instead distributed throughout the tree  
441 (Supplementary Figure 11). Thus, analyses under the best-fitting available models did  
442 not support the presence of bacterial lipid biosynthesis genes in LUCA. Further, the  
443 distortion of the ingroup topologies suggests that these outgroups may not be suitable  
444 for root inference, at least given current data and methods.

445

446

#### 447 *Origin of eukaryotic lipid biosynthesis genes*

448

449 Phylogenetics and comparative genomics suggest that eukaryotes arose from a  
450 symbiosis between an archaeal host cell and a bacterial endosymbiont that evolved  
451 into the mitochondrion (reviewed, from a variety of perspectives, in Embley and Martin  
452 2006; Martin et al. 2015; Eme et al. 2017; Roger et al. 2017). Specifically, genomic  
453 and phylogenetic evidence indicates that the host lineage belonged to the  
454 Asgardarchaeota superphylum, although the exact position of eukaryotes within  
455 Asgardarchaeota is unclear (Spang et al. 2015; Zaremba-Niedzwiedzka et al. 2017).  
456 The origin of bacterial-type membranes in eukaryotes is therefore an important  
457 evolutionary question that needs explanation. As noted above, multiple explanations  
458 have been proposed for the origin of eukaryotic membrane lipids (Woese et al. 1990;  
459 Kandler 1995; Lopez-Garcia and Moreira 2006; Baum and Baum 2014; Gould et al.



460 2015). An additional possibility, raised by our analyses, is that eukaryotes may have  
461 inherited their bacterial lipids vertically from the archaeal host cell.

462  
463 Indeed, evidence from both our study and Villanueva et al. (2016) points to the  
464 presence of orthologues for bacterial lipid genes in asgardarchaeote lineages. Both  
465 our study and Villanueva et al. find Glp, PlsC and PlsY orthologues in Lokiarchaeota.  
466 We additionally find a PlsC orthologue in Heimadallarchaeota, and PlsC and PlsY  
467 orthologues in Heimdallarchaeota and Thorarchaeota (Table 1).

468  
469 To evaluate this hypothesis, we expanded our datasets for GpsA, Glp and PlsC with  
470 a representative set of eukaryotic homologues. The resulting trees are poorly resolved  
471 (Supplementary Figures 13-15), but do not support a specific relationship between the  
472 eukaryotic sequences and any archaeal lineages, and so do not provide any  
473 compelling support for an origin of eukaryotic lipids via the archaeal host cell.

474

475

### 476 *Conclusions*

477

478 Our phylogenetic analyses of lipid biosynthesis genes support two main conclusions  
479 about prokaryotic cell physiology and early cell evolution. First, there is clear evidence  
480 for extensive horizontal transfer of lipid genes between Archaea and Bacteria, from  
481 potentially very early to more recent evolutionary times. In at least one recognised  
482 case – the synthesis of archaeal lipids by the bacterium *B. subtilis* (Guldan et al. 2008;  
483 Guldan et al. 2011) – these horizontally acquired genes are involved in membrane  
484 lipid synthesis; by induction, they could have similar functions in many of the other  
485 organisms that possess them. Therefore, the capability to synthesise both types of  
486 membranes may be more widespread than has been appreciated hitherto. However,  
487 gene presence is not sufficient to establish membrane composition, as these genes  
488 might be involved in other cellular processes. As in *B. subtilis*, experiments would be  
489 needed to test these predictions in any particular case. Crucially, the evidence that  
490 these genes undergo horizontal transfer, both early in evolution and more recently,  
491 provides a potential mechanism for the remarkable diversity of membrane lipids, and  
492 especially ether lipids, in diverse environmental settings (Schouten et al. 2001). We  
493 also note that it is intriguing that bacterial lipids with archaeal features are particularly  
494 abundant in settings characterised by high archaeal abundances, including cold  
495 seeps, wetlands and geothermal settings (Schouten et al. 2013b), potentially providing  
496 ecological opportunity for gene transfer.

497

498 A second, and more tentative, result of our study relates to the antiquity of the  
499 canonical archaeal and bacterial pathways. Our analyses suggest that the enzymes  
500 for making G1P lipids were already present in the common ancestor of Archaea and  
501 Bacteria. Under the consensus view that the root of the tree of life lies between  
502 Bacteria and Archaea, this would imply that LUCA could have made archaeal type  
503 membranes. This finding is intriguing in light of previous work suggesting the presence  
504 of isoprenoids produced by the mevalonate pathway in LUCA (Lombard and Moreira  
505 2011; Castelle and Banfield 2018). By contrast, the roots for the bacterial genes were  
506 weakly resolved within the bacterial domain. There is therefore no positive evidence  
507 from our trees to suggest that the bacterial pathway was present in LUCA, although  
508 we cannot exclude this possibility.

509



510 The consensus universal root between Bacteria and Archaea is supported by analyses  
511 of ancient gene duplications (Gogarten et al. 1989; Iwabe et al. 1989; Zhaxybayeva et  
512 al. 2005) and genome networks (Dagan et al. 2010), but some analyses have  
513 supported an alternative placement of the root within Bacteria (Cavalier-Smith 2006;  
514 Lake et al. 2009; Williams et al. 2015). Our trees do not exclude a within-Bacteria root,  
515 in which case LUCA would have possessed the bacterial pathway, and the archaeal  
516 pathway would have evolved along the archaeal stem, or in a common ancestor of  
517 Archaea and Firmicutes (Cavalier-Smith 2006; Lake et al. 2009).

518  
519 If one membrane lipid pathway evolved before the other, this would imply that one of  
520 the two prokaryotic lineages changed its membrane lipid composition during early  
521 evolution. The evolutionary processes that drive such changes remain unclear, in part  
522 because we still do not fully understand the functional differences between modern  
523 archaeal and bacterial membranes. Compared to bacterial-type membranes,  
524 archaeal-type membranes maintain their physiochemical properties over a broader  
525 range of temperatures, and may be more robust to other environmental extremes (Van  
526 de Vossenberg et al. 1998; Koga 2012). If the archaeal pathway is older than the  
527 bacterial pathway, then that could reflect a LUCA adapted to such extreme settings. It  
528 is then intriguing to speculate on the evolutionary drivers for subsequent adoption of  
529 bacterial-type membranes, especially since the bacteria appear to be more successful  
530 than the archaea in terms of abundance and genetic diversity (Danovaro et al. 2016;  
531 Hug et al. 2016; Castelle and Banfield 2018). Moreover, an analogous change has  
532 happened at least once in evolutionary history, during the origin of eukaryotic cells  
533 (Martin et al. 2015).

534  
535 It is possible that a transition to the bacterial type was driven by the lower energetic  
536 cost of making and repurposing fatty acid ester lipids, although we know of no  
537 published experimental data on these relative biosynthetic costs. Alternatively, the  
538 bacterial-type membrane lipids comprise a variety of fatty acyl moieties, varying in  
539 chain length, unsaturation, degree of branching and cyclisation, and these could  
540 impart a degree of flexibility and adaptability that provides a marginal benefit in  
541 dynamic mesophilic environments. If so, that advantage could translate to bacterial  
542 ether lipids that are also widespread in non-extreme settings and also characterised  
543 by a variety of alkyl forms (Pancost et al. 2001). Conversely, if bacterial-type  
544 membranes were ancestral, the transition to archaeal-type membranes could have  
545 been driven by adaptation to high environmental temperatures: ether bonds are more  
546 thermostable than esters (Van de Vossenberg et al. 1998; Koga 2012), and are also  
547 found in the membranes of thermophilic Bacteria (Kaur et al. 2015). In any case, the  
548 widespread occurrence of bacterial-type, archaeal-type and mixed-type membrane  
549 lipids in a range of environments, as well as the widespread occurrence of the  
550 associated biosynthetic pathways across both domains, suggests that except for high  
551 temperature and low pH settings, the advantages of either membrane type is marginal.

552  
553 Our results indicate that inter-domain transfer of membrane lipid biosynthesis genes  
554 appears to be widespread, providing a potential mechanism for understanding the  
555 variety of lipids with mixed characteristics that occur in the environment. Unfortunately,  
556 very little is currently known about the stereochemical diversity of environmental lipids;  
557 we are aware of only one study (Weijers et al., 2006) that has investigated this for a  
558 class of lipids of mixed character, the brGDGTs, which exhibit bacterial-type  
559 stereochemistry. Our work suggests that stereochemical diversity, just like other

560 putative features of the lipid divide, should also be re-investigated. Overall, and taken  
561 together with evidence from natural and experimental settings for the stability of mixed  
562 membranes (Guldan et al. 2008; Guldan et al. 2011; Caforio et al. 2018), our analyses  
563 suggest that membrane lipid composition is not an immutable hallmark of cellular  
564 lineages but, like other features of prokaryote physiology (Jain et al. 1999) can change  
565 over time.

566  
567

## 568 **Materials and Methods**

569  
570

### 570 *Sequence selection*

571

572 For Archaea, we selected 43 archaeal genomes, sampled evenly across the archaeal  
573 tree. We took corresponding archaeal G1PDH, GGGPS and DGGPS amino acid  
574 sequences from the data set of Villanueva et al. (2016) and performed BLASTp  
575 searches to find these sequences in genomes not included in that dataset. For  
576 Bacteria, we selected 64 bacterial genomes, sampled so as to represent the known  
577 genomic diversity of bacterial phyla (Hug et al. 2016). We used G3PDH *gpsa*, G3PDH  
578 *glp* and GlpK sequences from Yokobori et al. (2016) and performed BLASTp searches  
579 to find those sequences in bacterial species not in their data set. For PlsC and PlsY,  
580 we took the corresponding sequences from Villanueva et al. 2016, and performed  
581 BLASTp searches to find these sequences in the remaining genomes. For PlsB and  
582 PlsX, we searched for the respective terms in the gene database on the NCBI website,  
583 and upon finding well-verified occurrences, performed BLASTp searches to find the  
584 corresponding amino acid sequences in the remaining genomes. We then used  
585 BLASTp to look for bacterial orthologues of the archaeal enzymes and vice versa. We  
586 selected sequences that had an E-value of less than  $e^{-7}$  and at least 50% coverage.  
587 Accession numbers for sequences used are provided in Supplementary Table 3.

588  
589

### 590 *Phylogenetics*

591

592 The sequences were aligned in mafft (Kato et al. 2002) using the --auto option and  
593 trimmed in BMGE (Crisuolo and Gribaldo 2010) using the BLOSUM30 model, which  
594 is most suitable for anciently-diverged genes. To construct gene trees from our amino  
595 acid sequences, we first selected the best-fitting substitution model for each gene  
596 according to its BIC score using the model selection tool in IQ-Tree (Nguyen et al.  
597 2015). For all of the genes we analysed, the best-fitting model was a mixture model  
598 combining the LG exchangeability matrix (Le and Gascuel 2008) with site-specific  
599 composition profiles (the C40, C50 and C60 models (Lartillot and Philippe 2004; Le et  
600 al. 2008)) to accommodate across-site variation in the substitution process. LG+C60  
601 was used for G1PDH, GpsA, Glp and GlpK. LG+50 was used for DDDGPS, PlsC and  
602 PlsY. LG+C40 was used for GGGPS. A discretised Gamma distribution (Yang 1994)  
603 with 4 rate categories was used to model across-site rate variation. The trees were  
604 run with their respective models in PhyloBayes (Lartillot and Philippe 2004, 2006;  
605 Lartillot et al. 2007); convergence was assessed using the bpcomp and tracecomp  
606 programs (maxdiff < 0.1; effective sample sizes > 100), as recommended by the  
607 authors.

608

609 The trees were rooted with a lognormal uncorrelated molecular clock, using the LG  
610 model with a discretised Gamma distribution (Yang 1994) with 4 rate categories, and  
611 a Yule tree prior (Stadler 2009; Hartmann et al. 2010) in BEAST (Drummond 2007;  
612 Drummond et al. 2012). We also rooted the trees using minimal ancestral deviation  
613 (MAD) rooting (Tria et al 2017). MAD rooting requires a fully-resolved, bifurcating tree;  
614 since some parts of the consensus phylogenies were poorly resolved, we integrated  
615 over this topological uncertainty by computing the optimum MAD root position for each  
616 tree sampled during the MCMC analysis, and obtained marginal posterior probabilities  
617 for these root positions using RootAnnotator (Calvignac-Spencer et al. 2014).

618  
619 For G1PDH, GpsA and Glp, we also rooted the trees using a subsample of the  
620 outgroup sequences used by Yokobori et al. (2016). The outgroups used were two 3-  
621 dehydroquinate synthase (DHQS), five glucerol dehydrogenase (GDH) and five  
622 alcohol dehydrogenase (ALDH) sequences for G1PDH; six hydroxyacyl-CoA  
623 dehydrogenase (HACDH) and six UDP-glucose 6-dehydrogenase (UDPGDH)  
624 sequences for GpsA; and 12 FAD-dependent oxidoreductase sequences for Glp. All  
625 of three of these trees were inferred under the LG+C60 model to directly compare to  
626 the unrooted trees. Trees were also inferred from best fit models selected in IQTree  
627 (LG+C60 for G1PDH and Glp, and LG+C50 for GpsA). To construct trees for GpsA,  
628 Glp and PlsC including eukaryotic sequences, we performed BLAST searches for  
629 these sequences on 35 eukaryotic genomes from across the eukaryotic tree and  
630 followed the above steps to infer trees. LG+C50 was the best-fitting model for all three  
631 trees.

632  
633 Eukaryotic orthologues of prokaryotic lipid biosynthesis genes were identified by  
634 performing BLASTp searches on 35 eukaryotic genomes from across eukaryotic  
635 diversity using *Homo sapiens* query as the sequence in each case, selecting  
636 sequences with an E-value of  $e^{-7}$  or less, and at least 50% coverage. We then  
637 performed model testing in IQTree and inferred trees in PhyloBayes using the selected  
638 substitution model (LG+C50 for all three).

639  
640 All sequences, alignments and trees referred to in this study can be obtained from  
641 [10.6084/m9.figshare.6210137](https://doi.org/10.6084/m9.figshare.6210137).

642  
643

## 644 **Acknowledgements**

645  
646 GAC, RDP, and TAW conceived the project. GAC and TAW designed and performed  
647 the analyses. GAC, RDP and TAW interpreted the results and wrote the manuscript.  
648 GAC is supported by a Royal Society Research Grant to TAW. TAW is supported by  
649 a Royal Society University Research Fellowship. We thank George S. Attard, Anja  
650 Spang and T. Martin Embley for helpful feedback on the manuscript.

651  
652

## 653 **References**

654 Adam PS, Borrel G, Gribaldo S. 2018. Evolutionary history of carbon monoxide  
655 dehydrogenase/acetyl-CoA synthase, one of the oldest enzymatic complexes. Proc.  
656 Natl. Acad. Sci.:201716667. doi:10.1073/pnas.1716667115.

657  
658

Baum DA, Baum B. 2014. An inside-out origin for the eukaryotic cell. BMC Biol.

- 659 12:1–22. doi:10.1186/s12915-014-0076-2.  
660
- 661 Bell SD, Jackson SP. 1998. Transcription and translation in Archaea: A mosaic of  
662 eukaryal and bacterial features. *Trends Microbiol.* 6:222–227. doi:10.1016/S0966-  
663 842X(98)01281-5.  
664
- 665 Boucher Y, Kamekura M, Doolittle WF. 2004. Origins and evolution of isoprenoid  
666 lipid biosynthesis in archaea. *Mol. Microbiol.* 52:515–527. doi:10.1111/j.1365-  
667 2958.2004.03992.x.  
668
- 669 Caforio A, Siliakus MF, Exterkate M, Jain S, Jumde VR. 2018. Converting  
670 *Escherichia coli* into an archaeobacterium with a hybrid heterochiral membrane.  
671 *PNAS* 115:1–6. doi:10.1073/pnas.1721604115.  
672
- 673 Calvignac-Spencer S, Schulze JM, Zickmann F, Renard BY. 2014. Clock Rooting  
674 Further Demonstrates that Guinea 2014 EBOV is a Member of the Zaïre Lineage.  
675 *PLoS Curr.* 6:1–8.  
676 doi:10.1371/currents.outbreaks.c0e035c86d721668a6ad7353f7f6fe86.  
677
- 678 Castelle CJ, Banfield JF. 2018. Perspective Major New Microbial Groups Expand  
679 Diversity and Alter our Understanding of the Tree of Life. *Cell* 172:1181–1197.  
680 doi:10.1016/j.cell.2018.02.016.  
681
- 682 Cavalier-Smith T. 2006. Rooting the tree of life by transition analyses. *Biol. Direct*  
683 1:19. doi:10.1186/1745-6150-1-19.  
684
- 685 Cox CJ, Foster PG, Hirt RP, Harris SR, Embley TM. 2008. The archaeobacterial origin  
686 of eukaryotes. *Proc. Natl. Acad. Sci.* 105:20356–20361.  
687 doi:10.1073/pnas.0810647105.  
688
- 689 Criscuolo A, Gribaldo S. 2010. BMGE (Block Mapping and Gathering with Entropy):  
690 A new software for selection of phylogenetic informative regions from multiple  
691 sequence alignments. *BMC Evol. Biol.* 10. doi:10.1186/1471-2148-10-210.  
692
- 693 Dagan T, Roettger M, Bryant D, Martin W. 2010. Genome networks root the tree of  
694 life between prokaryotic domains. *Genome Biol. Evol.* 2:379–392.  
695 doi:10.1093/gbe/evq025.  
696
- 697 Danovaro R, Molari M, Corinaldesi C, Dell'Anno A. 2016. Macroecological drivers of  
698 archaea and bacteria in benthic deep-sea ecosystems. *Sci. Adv.* 2:1–12.  
699 doi:10.1126/sciadv.1500961.  
700
- 701 Drummond AJ, Rambaut A. 2007. BEAST: Bayesian evolutionary analysis by  
702 sampling trees. *BMC Evol. Biol.* 7:1–8. doi:10.1186/1471-2148-7-214.  
703
- 704 Drummond AJ, Suchard MA, Xie D, Rambaut A. 2012. Bayesian phylogenetics with  
705 BEAUti and the BEAST 1.7. *Mol. Biol. Evol.* 29:1969–1973.  
706 doi:10.1093/molbev/mss075.  
707
- 708 Embley TM, Martin W. 2006. Eukaryotic evolution, changes and challenges. *Nature.*

- 709 440:623–630. doi:10.1038/nature04546.  
710
- 711 Eme L, Spang A, Lombard J, Stairs CW, Ettema TJG. 2017. Archaea and the origin  
712 of eukaryotes. *Nat. Rev. Microbiol.* 15:711–723. doi:10.1038/nrmicro.2017.133.  
713
- 714 Fan Q, Relini A, Cassinadri D, Gambacorta A, Gliozzi A. 1995. Stability against  
715 temperature and external agents of vesicles composed of archaeal bolaform lipids  
716 and egg PC. *BBA - Biomembr.* 1240:83–88. doi:10.1016/0005-2736(95)00157-X.  
717 Garcia-Vallvé S, Romeu a, Palau J. 2000. Horizontal gene transfer in bacterial and  
718 archaeal complete genomes. *Genome Res.* 10:1719–1725.  
719 doi:10.1101/gr.130000.particular.  
720
- 721 Gattinger A, Schloter M, Munch JC. 2002. Phospholipid etherlipid and phospholipid  
722 fatty acid fingerprints in selected euryarchaeotal monocultures for taxonomic  
723 profiling. *FEMS Microbiol. Lett.* 213:133–139. doi:10.1016/S0378-1097(02)00794-2.  
724
- 725 Gogarten JP, Rausch T, Bernasconi P, Kibak H, Taiz L. 1989. Molecular Evolution of  
726 H<sup>+</sup>-ATPases. I. Methanococcus and Sulfolobus are Monophyletic with Respect to  
727 Eukaryotes and Eubacteria. *Zeitschrift fur Naturforsch. - Sect. C J. Biosci.* 44:641–  
728 650. doi:10.1515/znc-1989-7-816.  
729
- 730 Goldfine H. 2010. The appearance, disappearance and reappearance of  
731 plasmalogens in evolution. *Prog. Lipid Res.* 49:493–498.  
732 doi:10.1016/j.plipres.2010.07.003.  
733
- 734 Gould SB, Garg SG, Martin WF. 2016. Bacterial Vesicle Secretion and the  
735 Evolutionary Origin of the Eukaryotic Endomembrane System. *Trends Microbiol.*  
736 24:525–534. doi:10.1016/j.tim.2016.03.005.  
737
- 738 Gouy R, Baurain D, Philippe H. 2015. Rooting the tree of life: the phylogenetic jury is  
739 still out. *Philos. Trans. R. Soc. B Biol. Sci.* 370:20140329.  
740 doi:10.1098/rstb.2014.0329.  
741
- 742 Guldán H, Matysik FM, Bocola M, Sterner R, Babinger P. 2011. Functional  
743 assignment of an enzyme that catalyzes the synthesis of an archaea-type ether lipid  
744 in bacteria. *Angew. Chemie - Int. Ed.* 50:8188–8191. doi:10.1002/anie.201101832.  
745
- 746 Guldán H, Sterner R, Babinger P. 2008. Identification and Characterization of a  
747 Bacterial Glycerol-1-phosphate Dehydrogenase: Ni<sup>2+</sup>-Dependent AraM from  
748 *Bacillus subtilis*. *Biochemistry.* 47:7376–7384. doi:10.1021/bi8005779.  
749
- 750 Guy L, Ettema TJG. 2011. The archaeal “TACK” superphylum and the origin of  
751 eukaryotes. *Trends Microbiol.* 19:580–587. doi:10.1016/j.tim.2011.09.002.  
752
- 753 Hartmann K, Wong D, Stadler T. 2010. Sampling trees from evolutionary models.  
754 *Syst. Biol.* 59:465–476. doi:10.1093/sysbio/syq026.  
755
- 756 Hug LA, Baker BJ, Anantharaman K, Brown CT, Probst AJ, Castelle CJ, Butterfield  
757 CN, HERNSDORF AW, AMANO Y, KOTARO I, et al. 2016. A new view of the tree and life’s  
758 diversity. *Nature.* doi:10.1038/nmicrobiol.2016.48.



- 759  
760 Iwabe N, Kuma K-I, Hasegawa M, Osawa S, Source TM, Hasegawa M, Osawa S,  
761 Miyata T. 1989. Evolutionary Relationship of Archaeobacteria, Eubacteria, and  
762 Eukaryotes Inferred from Phylogenetic Trees of Duplicated Genes. *Proc. Natl. Acad. Sci. United States Am. Evol.* 86:9355–9359. doi:10.1073/pnas.86.23.9355.  
763  
764  
765 Jain R, Rivera MC, Lake JA. 1999. Horizontal gene transfer among genomes: The  
766 complexity hypothesis. *Proc. Natl. Acad. Sci.* 96:3801–3806.  
767 doi:10.1073/pnas.96.7.3801.  
768  
769 Kandler O. 1995. Cell wall biochemistry in Archaea and its phylogenetic implications.  
770 *J. Biol. Phys.* 20:165–169. doi:10.1007/BF00700433.  
771  
772 Katoh K, Misawa K, Kuma K, Miyata T. 2002. MAFFT: a novel method for rapid  
773 multiple sequence alignment based on fast Fourier transform. *Nucleic Acids Res.*  
774 30:3059–3066. doi:10.1093/nar/gkf436.  
775  
776 Kaur G, Mountain BW, Stott MB, Hopmans EC, Pancost RD. 2015. Temperature and  
777 pH control on lipid composition of silica sinters from diverse hot springs in the Taupo  
778 Volcanic Zone, New Zealand. *Extremophiles.* 19:327–44. doi:10.1007/s00792-014-  
779 0719-9.  
780  
781 Kelman LM, Kelman Z. 2014. Archaeal DNA Replication. *Annu. Rev. Genet.* 48:71–  
782 97. doi:10.1146/annurev-genet-120213-092148.  
783  
784 Koga Y. 2011. Early evolution of membrane lipids: How did the lipid divide occur? *J.*  
785 *Mol. Evol.* 72:274–282. doi:10.1007/s00239-011-9428-5.  
786  
787 Koga Y. 2012. Thermal adaptation of the archaeal and bacterial lipid membranes.  
788 *Archaea.* 2012. doi:10.1155/2012/789652.  
789  
790 Koga Y, Kyuragi T, Nishihara M, Sone N. 1998. Did archaeal and bacterial cells arise  
791 independently from noncellular precursors? A hypothesis stating that the advent of  
792 membrane phospholipid with enantiomeric glycerophosphate backbones caused the  
793 separation of the two lines of descent. *J. Mol. Evol.* 46:54–63.  
794 doi:10.1007/PL00006283.  
795  
796 Lake J a, Skophammer RG, Herbold CW, Servin J a. 2009. Genome beginnings:  
797 rooting the tree of life. *Philos. Trans. R. Soc. Lond. B. Biol. Sci.* 364:2177–2185.  
798 doi:10.1098/rstb.2009.0035.  
799  
800 Lartillot N, Brinkmann H, Philippe H. 2007. Suppression of long-branch attraction  
801 artefacts in the animal phylogeny using a site-heterogeneous model. *BMC Evol. Biol.*  
802 7:1–14. doi:10.1186/1471-2148-7-S1-S4.  
803  
804 Lartillot N, Philippe H. 2004. A Bayesian mixture model for across-site  
805 heterogeneities in the amino-acid replacement process. *Mol. Biol. Evol.* 21:1095–  
806 1109. doi:10.1093/molbev/msh112.  
807  
808 Le SQ, Gascuel O. 2008. An improved general amino acid replacement matrix. *Mol.*

- 809 Biol. Evol. 25:1307–1320. doi:10.1093/molbev/msn067.  
810
- 811 Le SQ, Lartillot N, Gascuel O. 2008. Phylogenetic mixture models for proteins.  
812 Philos. Trans. R. Soc. B Biol. Sci. 363:3965–3976. doi:10.1098/rstb.2008.0180.  
813
- 814 Lombard J, López-García P, Moreira D. 2012. The early evolution of lipid  
815 membranes and the three domains of life. Nat. Rev. Microbiol. 10:507–515.  
816 doi:10.1038/nrmicro2815.  
817
- 818 Lombard J, Moreira D. 2011. Origins and early evolution of the mevalonate pathway  
819 of isoprenoid biosynthesis in the three domains of life. Mol. Biol. Evol. 28:87–99.  
820 doi:10.1093/molbev/msq177.  
821
- 822 López-García P, Moreira D. 2006. Selective forces for the origin of the eukaryotic  
823 nucleus. BioEssays. 28:525–533. doi:10.1002/bies.20413.  
824
- 825 Martin W, Muller M. 1998. The hydrogen hypothesis for the origin of the first  
826 eukaryote. Nature. 392:37–41.  
827
- 828 Martin W, Russell MJ. 2003. On the origins of cells: a hypothesis for the evolutionary  
829 transitions from abiotic geochemistry to chemoautotrophic prokaryotes, and from  
830 prokaryotes to nucleated cells. Philos Trans R Soc L. B Biol Sci 358:55–59.  
831 doi:10.1098/rstb.2002.1183.  
832
- 833 Martin WF, Garg S, Zimorski V. 2015. Endosymbiotic theories for eukaryote origin.  
834 Philos. Trans. R. Soc. B Biol. Sci. 370:20140330. doi:10.1098/rstb.2014.0330.  
835
- 836 Nemoto N, Oshima T, Yamagishi A. 2003. Purification and characterization of  
837 geranylgeranylglyceryl phosphate synthase from a thermoacidophilic archaeon,  
838 *Thermoplasma acidophilum*. J. Biochem. 133:651–657. doi:10.1093/jb/mvg083.  
839
- 840 Nguyen LT, Schmidt HA, Von Haeseler A, Minh BQ. 2015. IQ-TREE: A fast and  
841 effective stochastic algorithm for estimating maximum-likelihood phylogenies. Mol.  
842 Biol. Evol. 32:268–274. doi:10.1093/molbev/msu300.  
843
- 844 Pancost RD, Bouloubassi I, Aloisi G, Sinninghe Damsté JS. 2001. Three series of  
845 non-isoprenoidal dialkyl glycerol diethers in cold-seep carbonate crusts. Org.  
846 Geochem. 32:695–707. doi:10.1016/S0146-6380(01)00015-8.  
847
- 848 Penny D. 1976. Criteria for optimising phylogenetic trees and the problem of  
849 determining the root of a tree. J. Mol. Evol. 8:95–116. doi:10.1007/BF01739097.  
850
- 851 Peretó J, López-García P, Moreira D. 2004. Ancestral lipid biosynthesis and early  
852 membrane evolution. Trends Biochem. Sci. 29:469–477.  
853 doi:10.1016/j.tibs.2004.07.002.  
854
- 855 Peterhoff D, Beer B, Rajendran C, Kumpula EP, Kapetaniou E, Guldan H, Wierenga  
856 RK, Sterner R, Babinger P. 2014. A comprehensive analysis of the  
857 geranylgeranylglyceryl phosphate synthase enzyme family identifies novel members  
858 and reveals mechanisms of substrate specificity and quaternary structure

- 859 organization. *Mol. Microbiol.* 92:885–899. doi:10.1111/mmi.12596.  
860
- 861 Reeve JN, Sandman K, Daniels CJ. 1997. Archaeal Histones, Nucleosomes, and  
862 Transcription Initiation. 89:999–1002.  
863
- 864 Roger AJ, Muñoz-Gómez SA, Kamikawa R. 2017. The Origin and Diversification of  
865 Mitochondria. *Curr. Biol.* 27:R1177–R1192. doi:10.1016/j.cub.2017.09.015.  
866  
867
- 868 Schouten S, Hopmans EC, Sinninghe Damsté JS. 2013a. The organic geochemistry  
869 of glycerol dialkyl glycerol tetraether lipids: A review. *Org. Geochem.* 54:19–61.  
870 doi:10.1016/j.orggeochem.2012.09.006.  
871
- 872 Schouten S, Hopmans EC, Sinninghe Damsté JS. 2013b. The organic geochemistry  
873 of glycerol dialkyl glycerol tetraether lipids: A review. *Org. Geochem.* 54:19–61.  
874 doi:10.1016/j.orggeochem.2012.09.006.  
875
- 876 Schouten S, Wakeham SG, Sinninghe Damsté JS. 2001. Evidence for anaerobic  
877 methane oxidation by archaea in euxinic waters of the Black Sea. *Org. Geochem.*  
878 32:1277–1281.  
879
- 880 Shimada H, Yamagishi A. 2011. Stability of heterochiral hybrid membrane made of  
881 bacterial sn -G3P lipids and archaeal sn -G1P lipids. *Biochemistry.* 50:4114–4120.  
882 doi:10.1021/bi200172d.  
883
- 884 Sinninghe Damsté JS, Rijpstra WIC, Hopmans EC, Foesel BU, Wüst PK, Overmann  
885 J, Tank M, Bryant DA, Dunfield PF, Houghton K, et al. 2014. Ether- and ester-bound  
886 iso-diabolic acid and other lipids in members of Acidobacteria subdivision 4. *Appl.*  
887 *Environ. Microbiol.* 80:5207–5218. doi:10.1128/AEM.01066-14.  
888
- 889 Sinninghe Damsté JS, Rijpstra WIC, Hopmans EC, Schouten S, Balk M, Stams AJM.  
890 2007. Structural characterization of diabolic acid-based tetraester, tetraether and  
891 mixed ether/ester, membrane-spanning lipids of bacteria from the order  
892 Thermotogales. *Arch. Microbiol.* 188:629–641. doi:10.1007/s00203-007-0284-z.  
893
- 894 Sinninghe Damsté JS, Schouten S, Hopmans EC, van Duin ACT, Geenevasen JAJ.  
895 2002. Crenarchaeol: the characteristic core glycerol dibiphytanyl glycerol tetraether  
896 membrane lipid of cosmopolitan pelagic crenarchaeota. *J. Lipid Res.* 43:1641–1651.  
897 doi:10.1194/jlr.M200148-JLR200.  
898
- 899 Sinninghe Damsté JS, Strous M, Rijpstra WIC, Hopmans EC, Geenevasen JAJ, van  
900 Duin ACT, van Niftrik LA, Jetten MSM. 2002. Linearly concatenated cyclobutane  
901 lipids form a dense bacterial membrane. *Nature.* 419:708–712.  
902 doi:10.1038/nature01067.  
903
- 904 Sojo V, Pomiankowski A, Lane N. 2014. A Bioenergetic Basis for Membrane  
905 Divergence in Archaea and Bacteria. *PLoS Biol.* 12.  
906 doi:10.1371/journal.pbio.1001926.  
907
- 908 Sousa FL, Martin WF. 2014. Biochemical fossils of the ancient transition from

- 909 geoenergetics to bioenergetics in prokaryotic one carbon compound metabolism.  
910 *Biochim. Biophys. Acta - Bioenerg.* 1837:964–981.  
911 doi:10.1016/j.bbabi.2014.02.001.  
912
- 913 Sousa FL, Thiergart T, Landan G, Nelson-Sathi S, Pereira I a C, Allen JF, Lane N,  
914 Martin WF. 2013. Early bioenergetic evolution. *Philos. Trans. R. Soc. Lond. B. Biol.*  
915 *Sci.* 368:20130088. doi:10.1098/rstb.2013.0088.  
916
- 917 Spang A, Saw JH, Jørgensen SL, Zaremba-Niedzwiedzka K, Martijn J, Lind AE, Eijk  
918 R Van, Schleper C, Guy L, Ettema TJG. 2015. Complex archaea that bridge the gap  
919 between prokaryotes and eukaryotes. *Nature.* doi:10.1038/nature14447.  
920
- 921 Stadler T. 2009. On incomplete sampling under birth-death models and connections  
922 to the sampling-based coalescent. *J. Theor. Biol.* 261:58–66.  
923 doi:10.1016/j.jtbi.2009.07.018.  
924
- 925 Tan HH, Makino A, Sudesh K, Greimel P, Kobayashi T. 2012. Spectroscopic  
926 evidence for the unusual stereochemical configuration of an endosome-specific lipid.  
927 *Angew. Chemie - Int. Ed.* 51:533–535. doi:10.1002/anie.201106470.  
928
- 929 Tria FDK, Landan G, Dagan T. 2017. Phylogenetic rooting using minimal ancestor  
930 deviation. *Nat. Ecol. Evol.* 1:193. doi:10.1038/s41559-017-0193.  
931
- 932 Villanueva L, Schouten S, Sinninghe Damsté JS. 2016. Phylogenomic analysis of  
933 lipid biosynthetic genes of Archaea shed light on the “lipid divide.” *Environ. Microbiol.*  
934 19:54–69. doi:10.1111/1462-2920.13361.  
935
- 936 Van de Vossenberg JLCM, Driessen AJM, Konings WN. 1998. The essence of being  
937 extremophilic: The role of the unique archaeal membrane lipids. *Extremophiles.*  
938 2:163–170. doi:10.1007/s007920050056.  
939
- 940 Wächtershäuser G. 1988. Pyrite Formation, the First Energy Source for Life: a  
941 Hypothesis. *Syst. Appl. Microbiol.* 10:207–210. doi:10.1016/S0723-2020(88)80001-  
942 8.  
943
- 944 Wächtershäuser G. 1992. Groundworks for an evolutionary biochemistry: The iron-  
945 sulphur world. *Prog. Biophys. Mol. Biol.* 58:85–201. doi:10.1016/0079-  
946 6107(92)90022-X.  
947
- 948 Wächtershäuser G. 2003. From pre-cells to Eukarya--a tale of two lipids. *Mol.*  
949 *Microbiol.* 47:13–22. doi:3267 [pii].  
950
- 951 Weijers JWH, Schouten S, Hopmans EC, Geenevasen JAJ, David ORP, Coleman  
952 JM, Pancost RD, Sinninghe Damsté JS. 2006. Membrane lipids of mesophilic  
953 anaerobic bacteria thriving in peats have typical archaeal traits. *Environ. Microbiol.*  
954 8:648–657. doi:10.1111/j.1462-2920.2005.00941.x.  
955
- 956 Weiss MC, Sousa FL, Mrnjavac N, Neukirchen S, Roettger M, Nelson-sathi S, Martin  
957 WF. 2016. The physiology and habitat of the last universal common ancestor. *Nat.*  
958 *Microbiol.* 1:1–8. doi:10.1038/nmicrobiol.2016.116.

- 959  
960 Wilkinson M, McInerney JO, Hirt RP, Foster PG, Embley TM. 2007. Of clades and  
961 clans: terms for phylogenetic relationships in unrooted trees. *Trends Ecol. Evol.*  
962 22:114–115. doi:10.1016/j.tree.2007.01.002.  
963  
964 Williams T a, Foster PG, Cox CJ, Embley TM. 2013. An archaeal origin of  
965 eukaryotes supports only two primary domains of life. *Nature.* 504:231–6.  
966 doi:10.1038/nature12779.  
967  
968 Williams TA, Embley TM. 2015. Changing ideas about eukaryotic origins. *Philos.*  
969 *Trans. R. Soc. Lond. B. Biol. Sci.* 370:20140318. doi:10.1098/rstb.2014.0318.  
970 Williams TA, Heaps SE, Cherlin S, Nye TMW, Boys RJ, Embley TM. 2015. New  
971 substitution models for rooting phylogenetic trees. *Philos. Trans. R. Soc. B Biol. Sci.*  
972 370:20140336. doi:10.1098/rstb.2014.0336.  
973  
974 Williams TA, Szöllösi GJ, Spang A, Foster PG, Heaps SE, Boussau B, Ettema TJG,  
975 Embley TM. 2017. Integrative modeling of gene and genome evolution roots the  
976 archaeal tree of life. *Proc. Natl. Acad. Sci.:*201618463.  
977 doi:10.1073/pnas.1618463114.  
978  
979 Woese CR, Kandler O, Wheelis ML. 1990. Towards a natural system of organisms:  
980 proposal for the domains Archaea, Bacteria, and Eucarya. *Proc. Natl. Acad. Sci.*  
981 87:4576–4579. doi:10.1073/pnas.87.12.4576.  
982  
983 Yang Z. 1994. Maximum likelihood phylogenetic estimation from DNA sequences  
984 with variable rates over sites: Approximate methods. *J. Mol. Evol.* 39:306–314.  
985 doi:10.1007/BF00160154.  
986  
987 Yokobori S, Nakajima Y, Akanuma S, Yamagishi A. 2016. Birth of Archaeal Cells:  
988 Molecular Phylogenetic Analyses of G1P Dehydrogenase, G3P Dehydrogenases,  
989 and Glycerol Kinase Suggest Derived Features of Archaeal Membranes Having G1P  
990 Polar Lipids. *Archaea.* 2016:1–16. doi:10.1155/2016/1802675.  
991  
992 Zaremba-Niedzwiedzka K, Caceres EF, Saw JH, Bäckström D, Juzokaite L,  
993 Anantharaman K, Starnawski P, Kjeldsen KU, Stott MB, Vancaester E, et al. 2017.  
994 Asgard archaea illuminate the origin of eukaryotic cellular complexity. *Nat. Publ. Gr.*  
995 doi:10.1038/nature21031.  
996  
997 Zhaxybayeva O, Lapierre P, Gogarten JP. 2005. Ancient gene duplications and the  
998 root(s) of the tree of life. *Protoplasma.* 227:53–64. doi:10.1007/s00709-005-0135-1.  
999  
1000
